# Supplementary material for: Heat- and Ultrasound-Assisted Aqueous Extraction of Soluble Carbohydrates and Phenolics from Carob Kibbles of Variable Size and Source Material
Source: PubMed Central journal article supplement (PMC7599798; doi:10.3390/foods9101364), 2020-09-25
Supplement: foods-09-01364-s001.pdf [file foods-09-01364-s001.pdf]

## Supplementary Material:

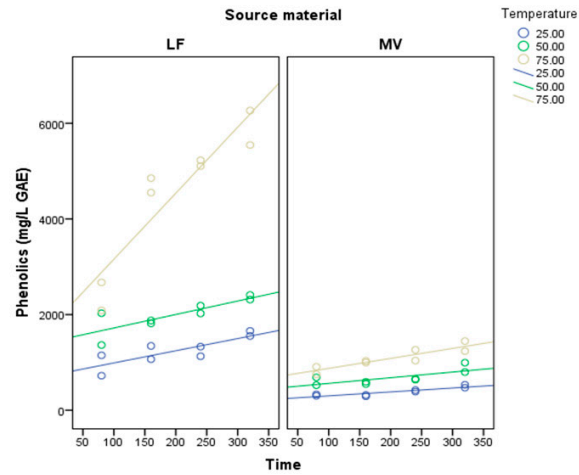

| Model Summary and Parameter Estimates |       |        |               |        |     |     |                     |          |        |
|---------------------------------------|-------|--------|---------------|--------|-----|-----|---------------------|----------|--------|
| Dependent Variable: Phenolics         |       |        |               |        |     |     |                     |          |        |
|                                       |       |        | Model Summary |        |     |     | Parameter Estimates |          |        |
| Source material                       |       |        | R Square      | F      | df1 | df2 | Sig.                | Constant | b1     |
| LF                                    | 25.00 | Linear | .678          | 12.636 | 1   | 6   | .012                | 734.433  | 2.547  |
|                                       | 50.00 | Linear | .673          | 12.330 | 1   | 6   | .013                | 1437.842 | 2.821  |
|                                       | 75.00 | Linear | .848          | 33.357 | 1   | 6   | .001                | 1777.625 | 13.806 |
| MV                                    | 25.00 | Linear | .808          | 25.190 | 1   | 6   | .002                | 219.350  | .815   |
|                                       | 50.00 | Linear | .549          | 7.291  | 1   | 6   | .036                | 442.758  | 1.184  |
|                                       | 75.00 | Linear | .820          | 27.321 | 1   | 6   | .002                | 666.383  | 2.087  |

The independent variable is Time.

**Figure S1.** Regression of total phenolics concentration in carob juice with extraction time (60, 180, 240, and 320 min) using heat-assisted conventional method over a range of temperatures (25, 50, 75 °C) for the two source materials (LF: Lefkaritiki; MV: Mavroteratsia). Data points represent means of three replicates.
